# Supplementary material
Source: Research Square preprint supplement (doi:10.21203/rs.3.rs-9053609/v1)
Supplement: Supplementary file 1 [file f2ee263b7cbd737bc8e5c6e3.pdf]

**Supplementary Table 1.** GenBank Accession Numbers for the Canine Influenza Viruses (CIV) Sequenced from the Alabama Outbreak.

|        | Virus name                     | GenBank Accession Numbers by Gene Segment     |                                                                                              |
|--------|--------------------------------|-----------------------------------------------|----------------------------------------------------------------------------------------------|
| Case-1 | A/canine/Alabama/2751998/2022  | PB1 PZ008305<br>HA<br>NP<br>M PZ008308<br>NS  | PZ008306<br>PZ008307<br>PZ008309                                                             |
| Case-2 | A/canine/Alabama/28101994/2022 | PB2<br>PB1<br>PA<br>HA<br>NP<br>NA<br>M<br>NS | PZ008310<br>PZ008311<br>PZ008312<br>PZ008313<br>PZ008314<br>PZ008315<br>PZ008316<br>PZ008317 |
| Case-3 | A/canine/Alabama/3101989/2022  | PB1<br>PA<br>HA<br>M<br>NS                    | PZ008318<br>PZ008319<br>PZ008320<br>PZ008321<br>PZ008322                                     |
| Case-4 | A/canine/Alabama/591993/2022   | PB2<br>HA<br>NP<br>NA<br>NS                   | PZ008323<br>PZ008324<br>PZ008325<br>PZ008326<br>PZ008327                                     |
| Case-5 | A/canine/Alabama/641995/2022   | PB2<br>PB1<br>PA<br>HA<br>NP<br>NA<br>M<br>NS | PZ008328<br>PZ008329<br>PZ008330<br>PZ008331<br>PZ008332<br>PZ008333<br>PZ008334<br>PZ008335 |
